# Supplementary material
Source: PubMed Central journal article supplement (PMC3690121)
Supplement: NIHMS461571-supplement-01.pdf [file NIHMS461571-supplement-01.pdf]

**Appendix E1.** Detailed list of potential testing indicators abstracted from ED medical records.**Risk Factors (Past or Current)**

Sexually transmitted disease (gonorrhea, chlamydia, cervicitis, urethritis, STD exposure, trichomonas, herpes, body lice, warts, cervical cancer, syphilis, hepatitis)

Man having sex with men (includes bisexual)

Heterosexual contact

Sex worker

Multiple sex partners

Exchange of money or drugs for sex

Sexual assault

Sex with partner known to be HIV positive

Sex with partner who is injection drug user

Prison/incarceration

Transfusion of blood products

Transplantation

Health care worker

Alcohol abuse

Marijuana use

Intravenous drug use

Crack/cocaine use

Drug use nonspecified

**Symptoms or Signs Consistent With HIV Infection (Current)**

Fever

Fatigue

Rash

Swollen lymph glands

Sore throat

Feeling achy/myalgias

Nausea/vomiting

Diarrhea

Night sweats

“Constitutional symptoms”

Loss of appetite

Abdominal pain

Significant weight loss

Atypical infections

Pneumonia

Pharyngitis

Viral syndrome

Recurrent infections

Abscess

**AIDS-Defining Illness if Patient Was HIV Infected (Current)**

Kaposi sarcoma

Wasting syndrome

Oral thrush

*Pneumocystis carinii* pneumonia

**Risk-Related Diagnoses (Current)**

Urethritis

Genital herpes

Urethritis

Epididymo-orchitis

Syphilis

Cervicitis/pelvic inflammatory disease

Known or suspected STD exposure

**Other**

Clinician suspicion of HIV directly documented in charting (either discussion of possible HIV or referral for off-site testing)

Patient hospitalized

STD, Sexually transmitted disease.
